# Supplementary material for: Highly efficient near-infrared organic dots based on novel AEE fluorogen for specific cancer cell imaging
Source: Royal Society of Chemistry journal article supplement (doi:10.1039/c5ra04669f), 2015-01-01
Supplement: c5ra04669f1.pdf [file c5ra04669f1.pdf]

# Highly Efficient Near-infrared Organic Dots

## Based on Novel AEE Fluorogen for Specific Cancer Cell Imaging

Yan Zhang,<sup>a</sup> Kaiwen Chang,<sup>b</sup> Bin Xu,<sup>a</sup> Jinlong Chen,<sup>a</sup> Lulin Yan,<sup>a</sup> Suqian Ma,<sup>a</sup> Changfeng Wu,<sup>\*b</sup>  
Wenjing Tian<sup>\*a</sup>

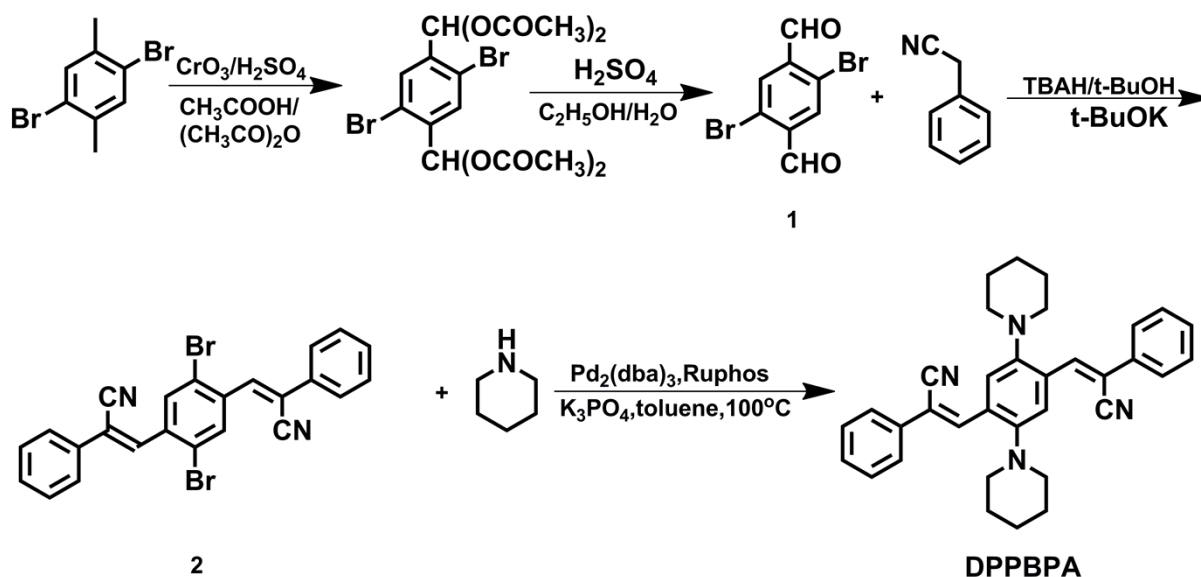

Scheme S1. synthesis route of DPPBPA

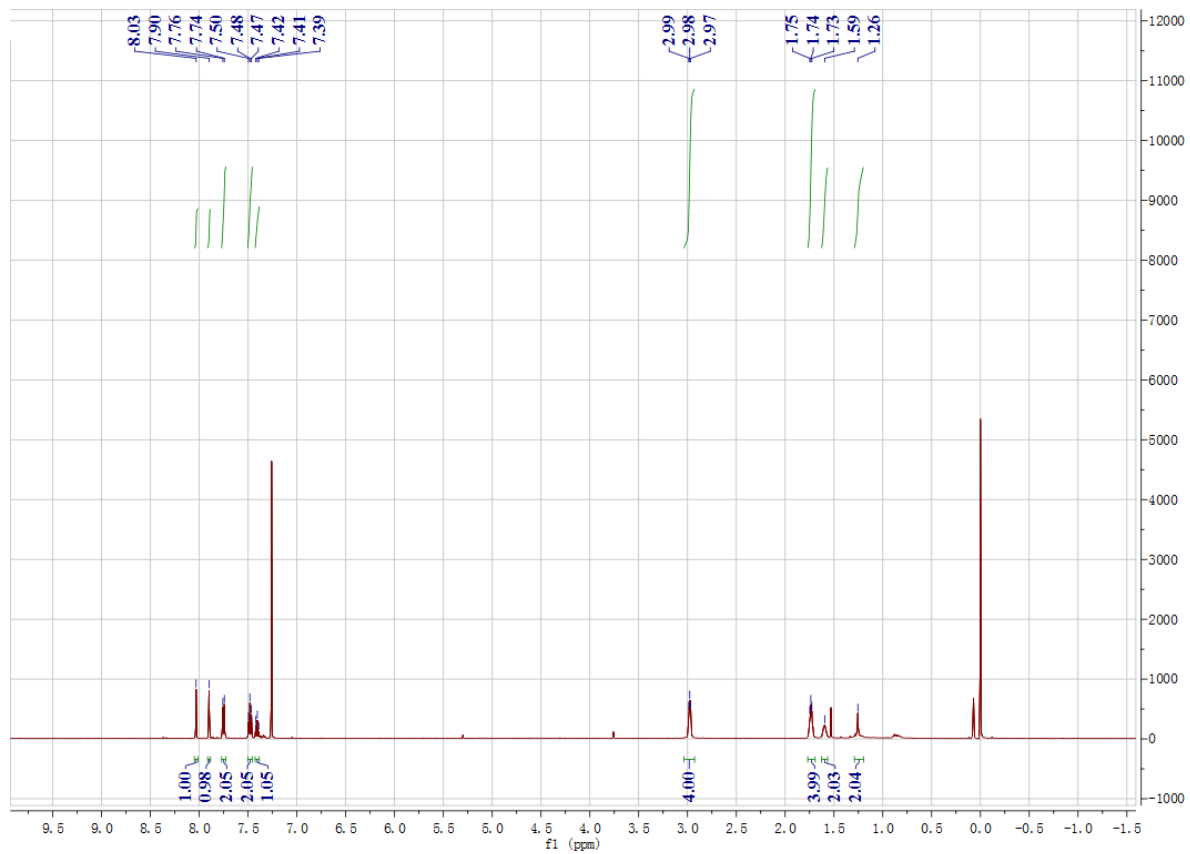

**Figure S1.** <sup>1</sup>H NMR of DPPBPA

2014112010 #332 RT: 4.45 AV: 1 NL: 2.93E6  
T: + c Full ms [50.00-1000.00]

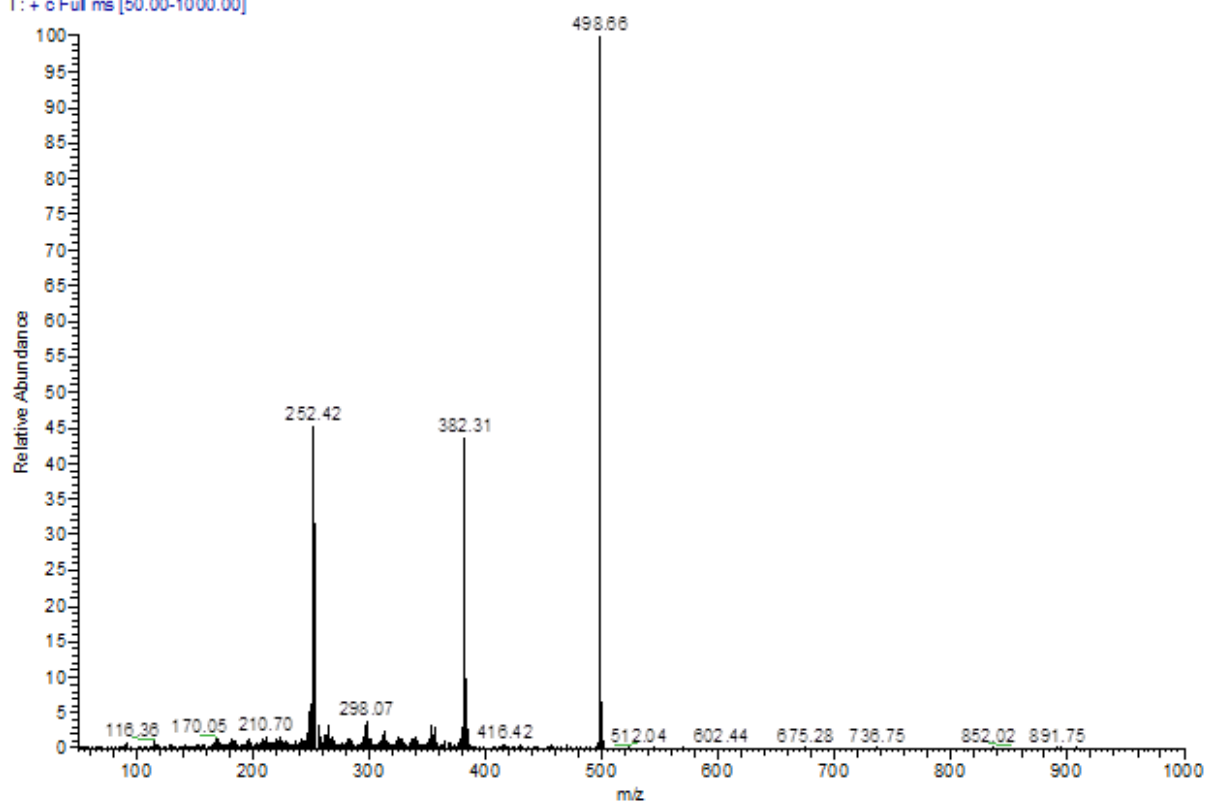

**Figure S2.** GC-MS of DPPBPA

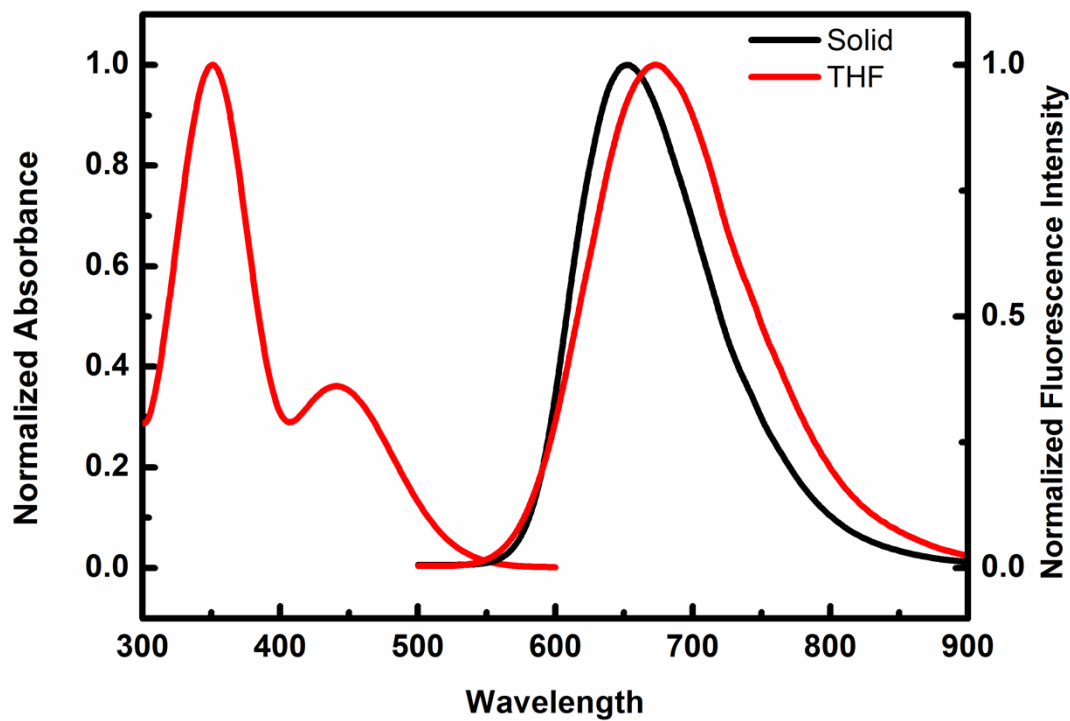

**Figure S3.** absorption spectra and PL spectra of DPPBPA

|                    | Solution (THF) | Powder |
|--------------------|----------------|--------|
| $\Phi_F$           | 0.29           | 0.78   |
| $\tau$ (ns)        | 5.78           | 7.09   |
| $K_r/10^7(s^{-1})$ | 5.0            | 11.0   |

**Table S1.** photophysics data of DPPBPA.
